# Supplementary material for: Air pollution and the incidence of ischaemic and haemorrhagic stroke in the South London Stroke Register: a case–cross-over analysis
Source: PubMed Central journal article supplement — J Epidemiol Community Health. 2017 Apr 13;71(7):707–12. doi: 10.1136/jech-2016-208025 (PMC5485750; doi:10.1136/jech-2016-208025), 2017-04-13
Supplement: jech-2016-208025supp003.pdf [file jech-2016-208025supp003.pdf]

**Table S1:** Estimating the percentage change in risk [95% CI] per 10 µg/m<sup>3</sup> increase in pollutant: Single pollutant regression models<sup>§</sup>

| <b>Daily mean<br/>Pollutant<br/>(UDLM lags 0-1)</b> | <b>All Stroke<br/>(No. of cases =1,758)<br/><br/>% change [95% CI]</b> | <b>Ischaemic Stroke<br/>(No. of cases=1,311)<br/><br/>% change [95% CI]</b> | <b>Haemorrhagic Stroke<br/>(No. of cases=256)<br/><br/>% change [95% CI]</b> |
|-----------------------------------------------------|------------------------------------------------------------------------|-----------------------------------------------------------------------------|------------------------------------------------------------------------------|
| <b>Single pollutant regression model</b>            |                                                                        |                                                                             |                                                                              |
| PM <sub>2.5</sub>                                   | -4.5 [-12.4, 4.2]                                                      | -6.6 [-15.7, 3.5]                                                           | -14.4 [-32.1, 8.0]                                                           |
| PM <sub>10</sub>                                    | -4.1[-9.6, 1.8]                                                        | -4.8 [-11.2, 2.0]                                                           | -12.3 [-25.1, 2.7]                                                           |
| O <sub>3</sub>                                      | -2.2 [-6.9, 2.7]                                                       | -1.0 [-6.5, 4.8]                                                            | -4.8 [-16.9, 9.0]                                                            |
| NO <sub>2</sub>                                     | -0.1 [-5.4, 5.5]                                                       | -1.3 [-7.3, 5.1]                                                            | -2.1 [-14.7, 12.3]                                                           |
| NO <sub>x</sub>                                     | 0.6 [-1.1, 2.3]                                                        | -0.1 [-2.0, 1.9]                                                            | 1.1 [-2.7, 5.1]                                                              |

<sup>§</sup>The conditional logistic regression model fits the pollutant at lags 0 and 1 and adjusts for, two natural cubic splines (df=2) for temperature (lags 0-1 and lags 2-6), two natural cubic splines (df=2) for humidity (lags 0-1 and lags 2-6), public holidays and a sine /cosine annual cycle

**Table S2:** Estimating the percentage change in risk [95% CI] per 10µg/m<sup>3</sup> increased in measured§ pollutant.

|                                           | All Stroke   |                   | Ischaemic Stroke |                   | Haemorrhagic Stroke |                     |
|-------------------------------------------|--------------|-------------------|------------------|-------------------|---------------------|---------------------|
|                                           | No. of cases | % Change [95% CI] | No. of cases     | % Change [95% CI] | No. of cases        | % Change [95% CI]   |
| <b>Single Pollutant Regression model‡</b> |              |                   |                  |                   |                     |                     |
| PM <sub>2.5</sub>                         | 1,662        | -6.1 [-13.3, 1.8] | 1,235            | -7.1 [-15.4, 2.0] | 239                 | -10.7 [-29.5, 13.1] |
| PM <sub>10</sub>                          | 1,653        | -4.0 [-9.2, 1.4]  | 1,226            | -3.8 [-9.6, 2.4]  | 238                 | -10.0 [-22.8, 4.9]  |
| O <sub>3</sub>                            | 1,691        | -1.0 [-5.7, 4.1]  | 1,255            | -0.3 [-5.8, 5.6]  | 243                 | 2.4 [-10.4, 16.9]   |
| NO <sub>2</sub>                           | 1,691        | -1.1 [-5.1, 3.2]  | 1,262            | -1.5 [-6.1, 3.4]  | 238                 | 0.7 [-9.8, 12.4]    |
| NO <sub>x</sub>                           | 1,693        | -0.2 [-1.4, 1.1]  | 1,263            | -0.4 [-1.9, 1.0]  | 239                 | 0.3 [-2.8, 3.5]     |

§ Pollutant measured at an urban background central London (Bloomsbury) monitoring site (Source: Automatic Urban and Rural Monitoring Network (AURN) Data Archive. © Crown 2015 copyright Defra via uk-air.defra.gov.uk, licenced under the [Open Government Licence \(OGL\)](#))

‡The conditional logistic model fits the pollutant at lag 0 and adjusts for, two natural cubic splines (df=2) for temperature (lags 0-1 and lags 2-6), two natural cubic splines (df=2) for humidity (lags 0-1 and lags 2-6), public holidays and a sine / cosine annual cycle. Models containing PM<sub>2.5</sub> also included a binary variable to indicate whether data were gathered by a TEOM or an FDMS monitor.
